# Supplementary material
Source: ML conference proceedings conference paper supplement (https://openreview.net/forum?id=JHcj9gcks3)

DATASET DETAILS

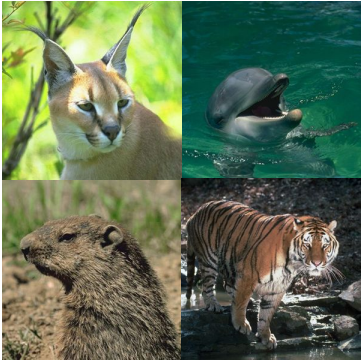

|                                      |                           |
|--------------------------------------|---------------------------|
| Dataset:                             | animals                   |
| # images ( <b>n</b> ):               | 80                        |
| # classes ( <b>k</b> ):              | 20                        |
| Label types:                         | {hard,soft}               |
| Relative Cost ( $\beta$ ):           | 10                        |
| Utility ( $\mathbf{f}(\mathbf{p})$ ) | $\sigma^{-1}(\mathbf{p})$ |

EXAMPLE

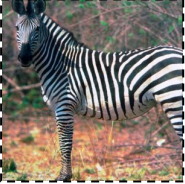

|            |     |       |   |     |       |   |
|------------|-----|-------|---|-----|-------|---|
|            |     | Zebra |   |     | Horse |   |
| Hard Label | 0   | 1     | 0 | ... | 0     | 0 |
| Soft Label | 0.1 | 0.6   | 0 | ... | 0.3   | 0 |

ANALYSIS

| Signal      | Information ratio                           | Asymptotic behavior                                                                                                      |
|-------------|---------------------------------------------|--------------------------------------------------------------------------------------------------------------------------|
| Hard Labels | $\frac{2n(n+k-1-n/k)}{(n+k)(n+k-1)(n+k-2)}$ | $\rightarrow \begin{cases} O(\frac{1}{n}) & n \gg k \\ O(\frac{1}{n}) & n = k \\ O(\frac{1}{k^2}) & n \ll k \end{cases}$ |
| Soft Labels | $\frac{kn}{(n+k)(n+k-1)}$                   | $\rightarrow \begin{cases} O(\frac{1}{n}) & n \gg k \\ O(1) & n = k \\ O(\frac{1}{k}) & n \ll k \end{cases}$             |

INFORMATIVENESS

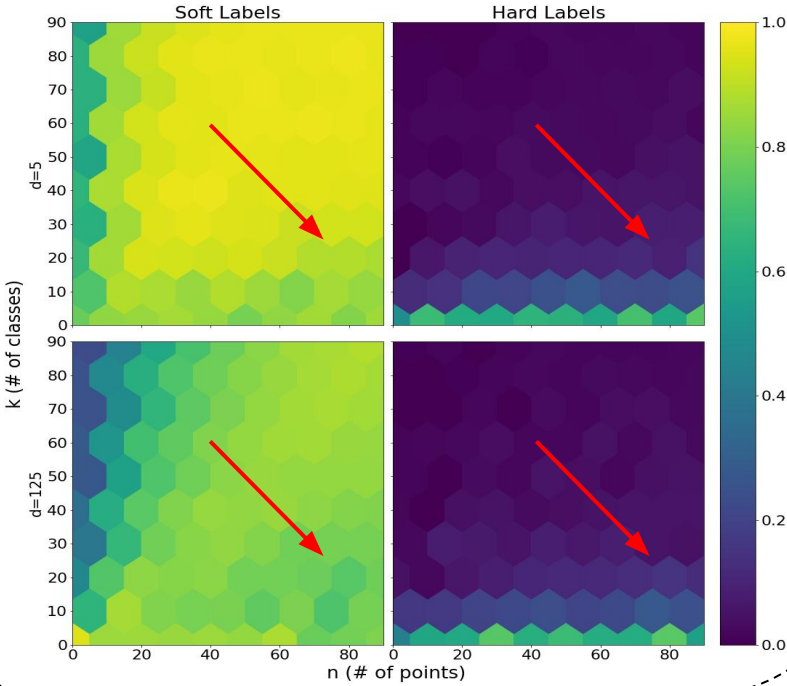

COST-BENEFIT TRADEOFF

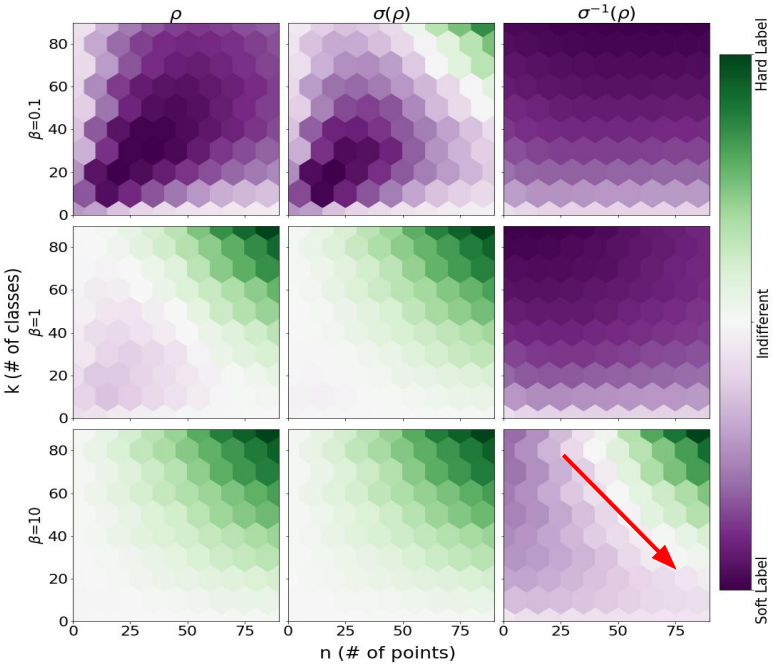

Supplement: supplementary_material [file attachment]
