# Supplementary material
Source: ML conference proceedings conference paper supplement (https://openreview.net/forum?id=JHcj9gcks3)

airplane

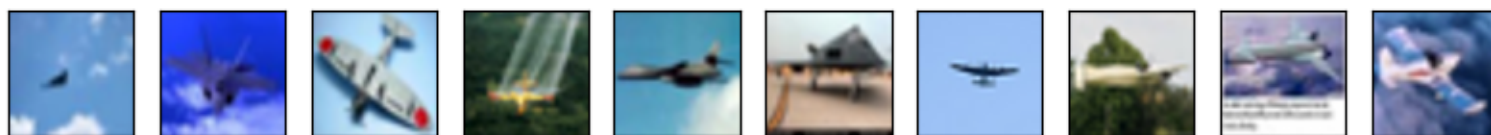

automobile

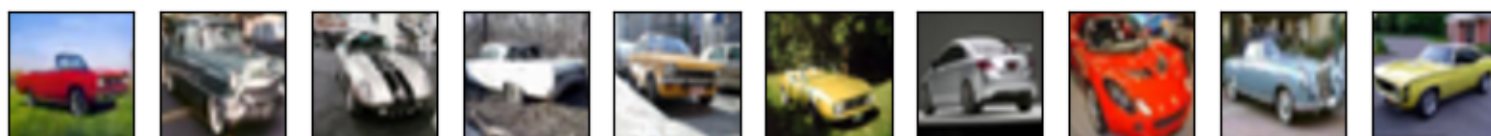

bird

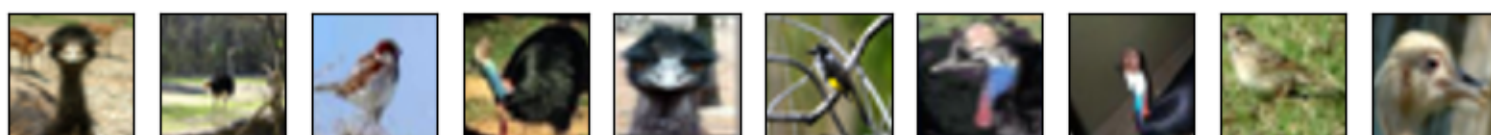

cat

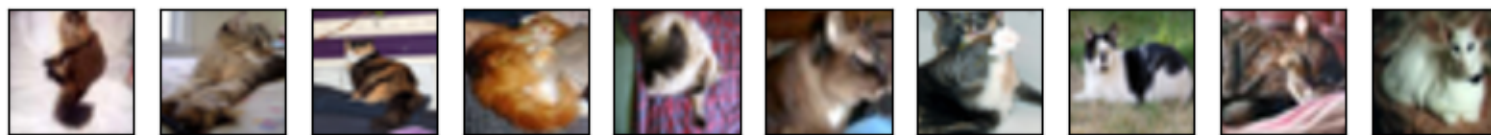

deer

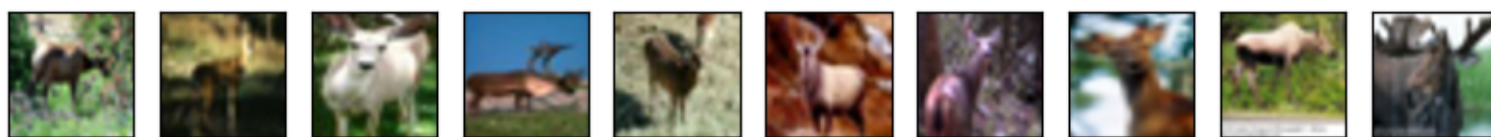

dog

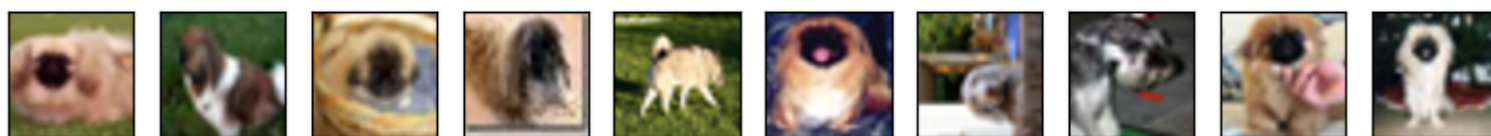

frog

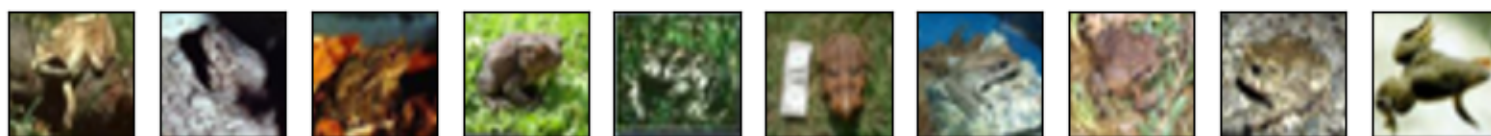

horse

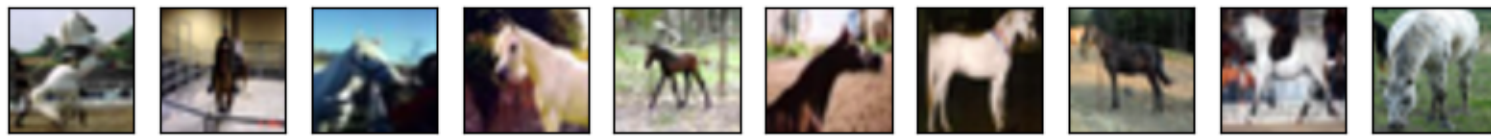

ship

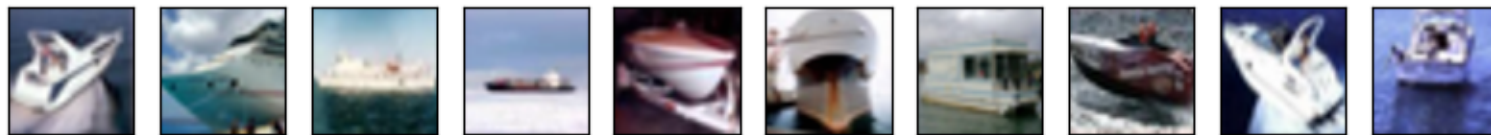

truck

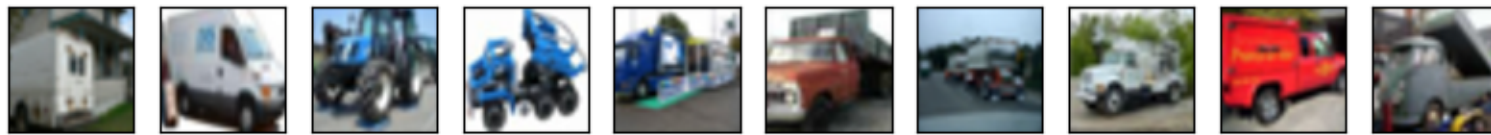

Supplement: supplementary_material [file attachment]

airplane

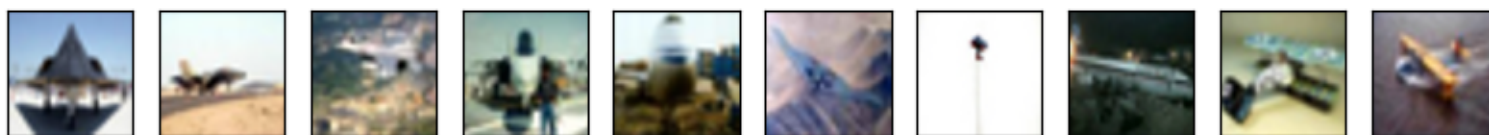

automobile

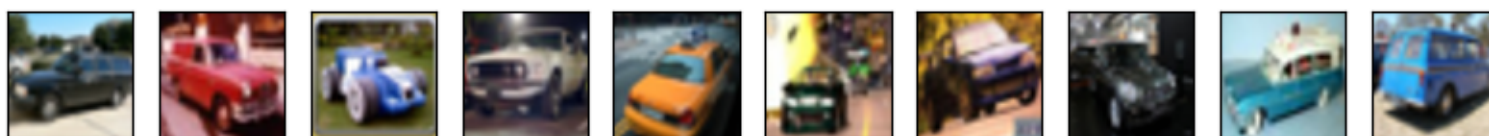

bird

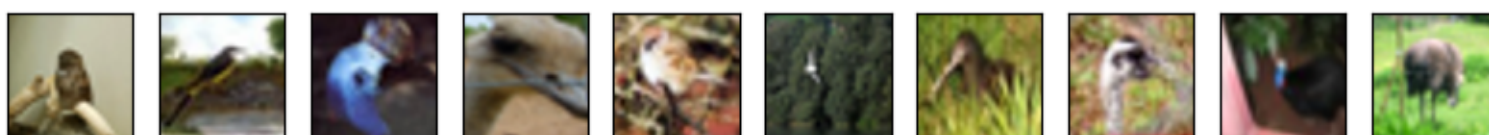

cat

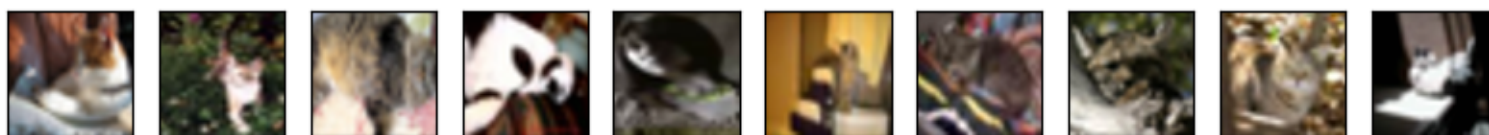

deer

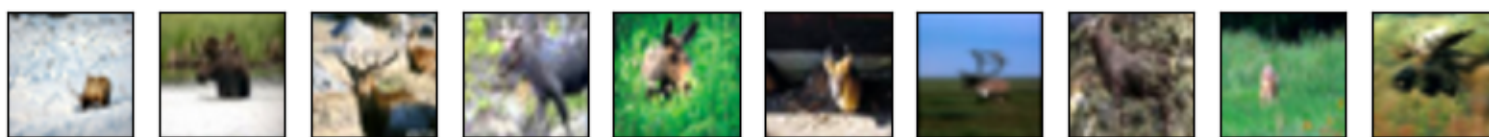

dog

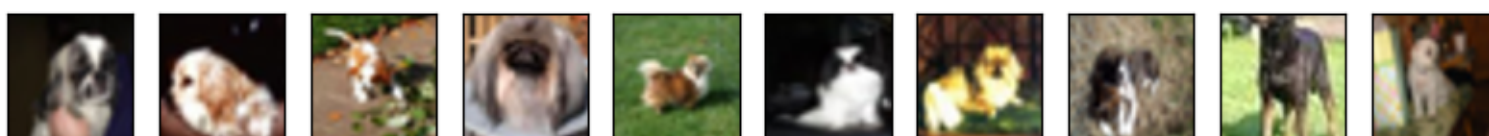

frog

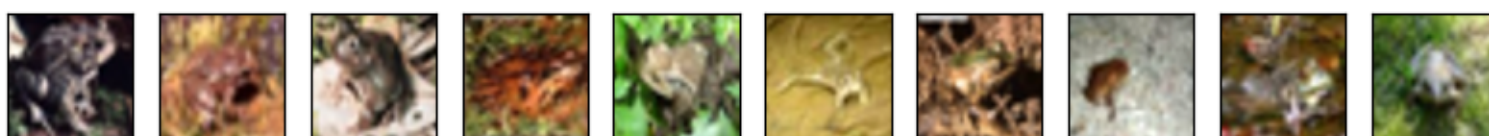

horse

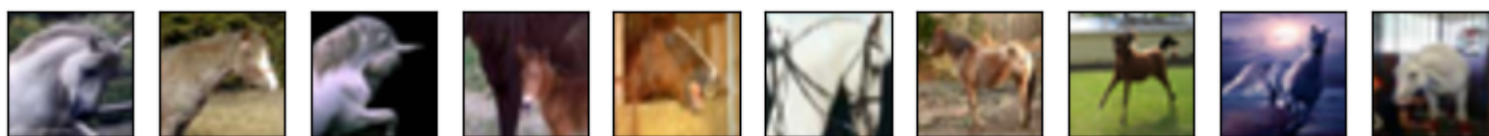

ship

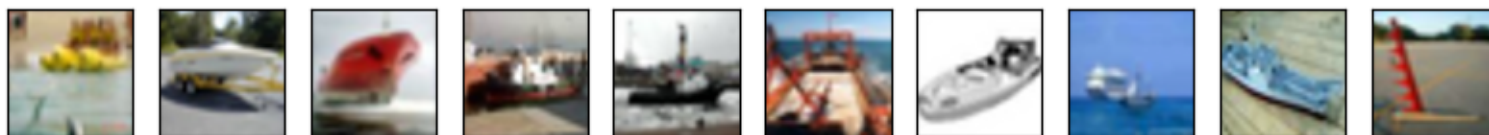

truck

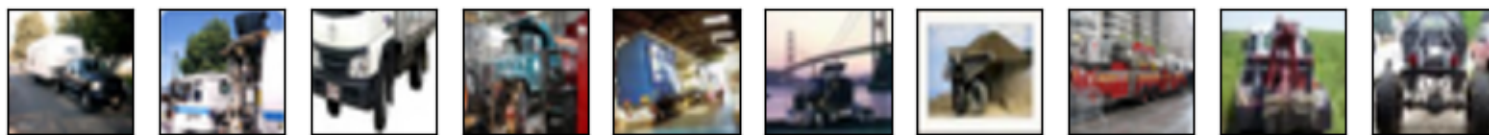

Supplement: supplementary_material [file attachment]
